# Supplementary material for: Shape-controlled synthesis of α-Fe2O3 nanocrystals for efficient adsorptive removal of Congo red
Source: Royal Society of Chemistry journal article supplement (doi:10.1039/c5ra06324h), 2015-01-01
Supplement: c5ra06324h1.pdf [file c5ra06324h1.pdf]

Supplementary Information for

## **Shape-controlled synthesis of $\alpha$ -Fe<sub>2</sub>O<sub>3</sub> nanocrystals for efficient adsorptive removal of Congo red**

Jintao Wang, Lei Xu, Zaiyong Zhang, Pei-Pei Sun, Min Fang and Hong-Ke Liu

*Bio-Functional Material Key Lab of Jiangsu Province, Jiangsu Collaborative Innovation Center of Biomedical Functional Materials, School of Chemistry and Materials Science, Nanjing Normal University, Wenyuan Road 1, Nanjing 210023, PR China. E-mail: liuhongke@njnu.edu.cn*

### **Contents:**

- 1 Synthesis of the ligand 2,4,6-Tris(pyrazol-1-yl)-1,3,5-triazine(Tptz).
- 2 The FT-IR spectrum of the obtained products A1, A2 and A3. (Fig. S1)
- 3 TEM images of the products obtained from pure H<sub>2</sub>O. (Fig. S2)
- 4 PXRD pattern of the synthesized sample in pure H<sub>2</sub>O. (Fig. S3)
- 5 PXRD patterns of the synthesized samples in the absence of Tptz in three kinds of mixed solvent DMF/H<sub>2</sub>O. (Fig. S4)
- 6 TEM images of the samples obtained from different solvent DMF/H<sub>2</sub>O in the presence of 0.1-0.5 mmol Tptz. (Fig. S5)
- 7 Nitrogen adsorption-desorption isotherms and Barrett-Joyner-Halenda (BJH) pore size distribution profiles of S1, S2 and S3. (Fig. S6)
- 8 Recycle test of CR removal efficiency of  $\alpha$ -Fe<sub>2</sub>O<sub>3</sub> A3. (Fig. S7)

---

### Synthesis of the ligand 2,4,6-Tris(pyrazol-1-yl)-1,3,5-triazine (Tptz)

Tptz can be easily obtained via the reported method.<sup>1</sup> Typically, cyanuric chloride (1.84 g, 10 mmol) and pyrazole (4.08 g, 60 mmol) were mixed and stirred rapidly without solvent for 5 min at 60 °C. Then, the reaction mixture was dissolved in 100 mL chloroform and washed with 100 mL distilled water. The organic layer was collected and aqueous layer was further extracted with chloroform (3×50 mL). The combined organic layer was dried over anhydrous MgSO<sub>4</sub> and evaporated to dryness. The resulting white powder was collect and the <sup>1</sup>H-NMR data were identical with those reported in literature.

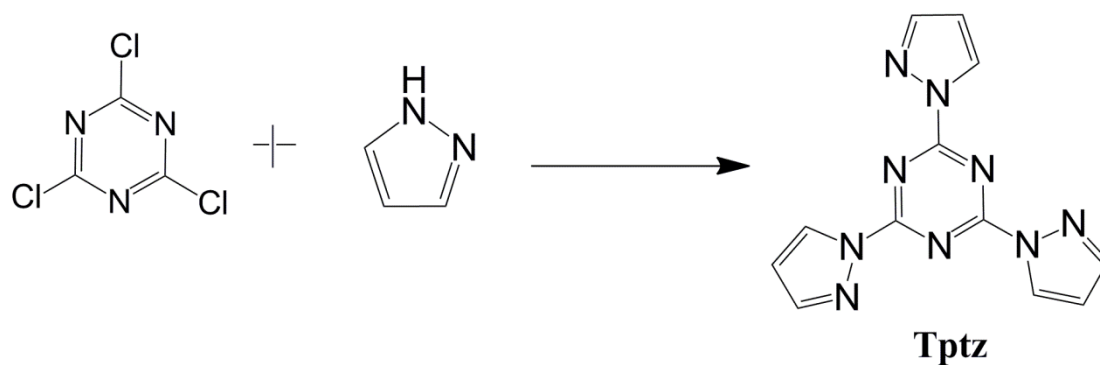

<sup>1</sup> D. Azarifar, M. A. Zolfigol and A. Forghaniha, *Heterocycles*, 2004, **63**, 1897-1901.

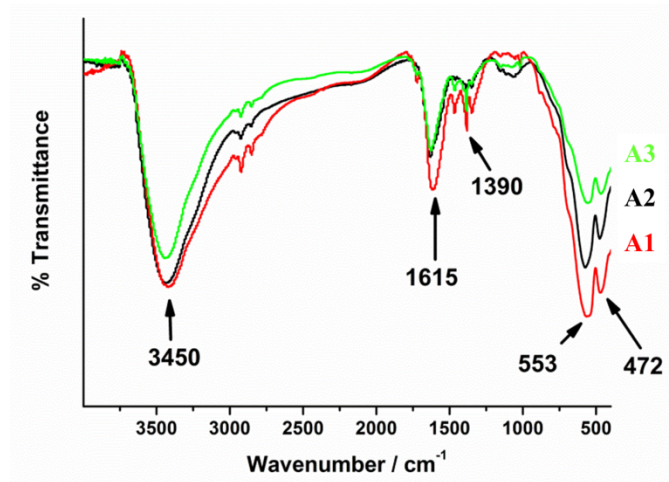

Fig. S1. The FT-IR spectrum of the obtained products A1, A2 and A3.

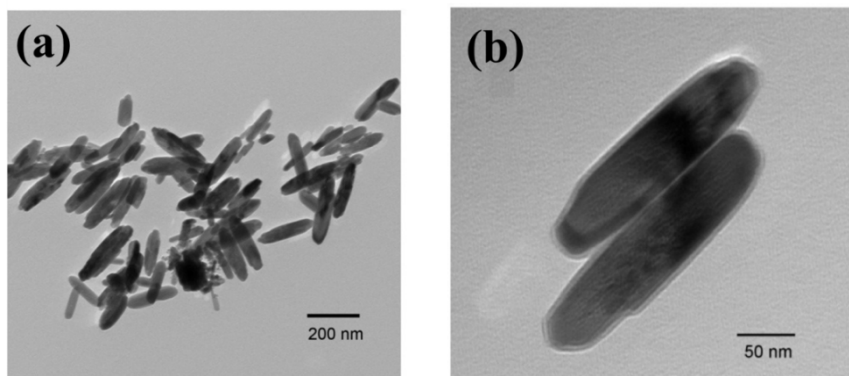

Fig. S2. TEM images of the products obtained from pure H<sub>2</sub>O. (a, scale bar = 200 nm; b, scale bar = 50 nm).

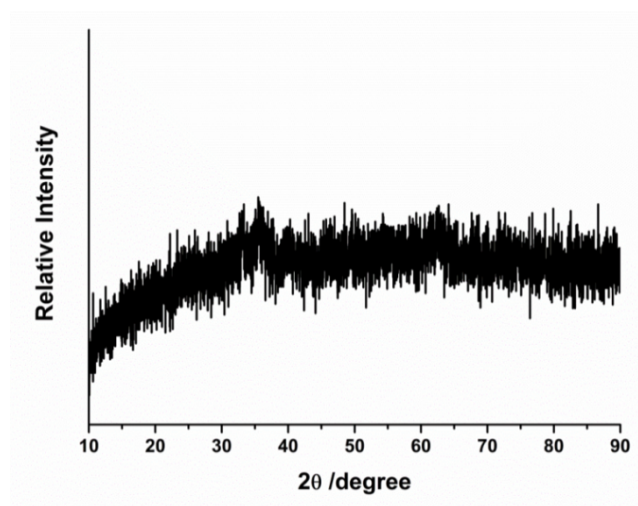

Fig. S3. PXRD pattern of the synthesized sample in pure H<sub>2</sub>O.

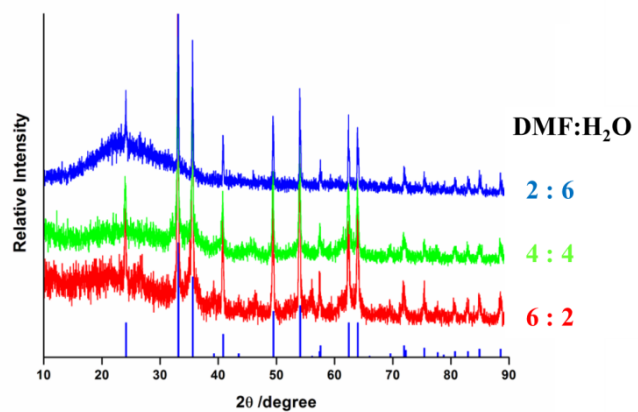

Fig S4. PXRD patterns of the synthesized samples in the absence of Tptz in three kinds of mixed solvent DMF/H<sub>2</sub>O.

| TPTz:FeCl <sub>3</sub> ·6H <sub>2</sub> O | DMF/H <sub>2</sub> O=6:2 mL                                                         | DMF/H <sub>2</sub> O=4:4 mL                                                          | DMF/H <sub>2</sub> O=2:6 mL                                                           |
|-------------------------------------------|-------------------------------------------------------------------------------------|--------------------------------------------------------------------------------------|---------------------------------------------------------------------------------------|
| 0.1:0.2 mmol                              | 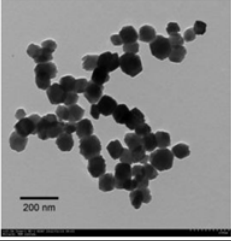   |    |    |
| 0.3:0.2 mmol                              |    |    |    |
| 0.4:0.2 mmol                              |   |   |   |
| 0.5:0.2 mmol                              |  |  |  |

Fig S5. TEM images of the samples obtained from different solvent DMF/H<sub>2</sub>O in the presence of 0.1-0.5 mmol Tptz.

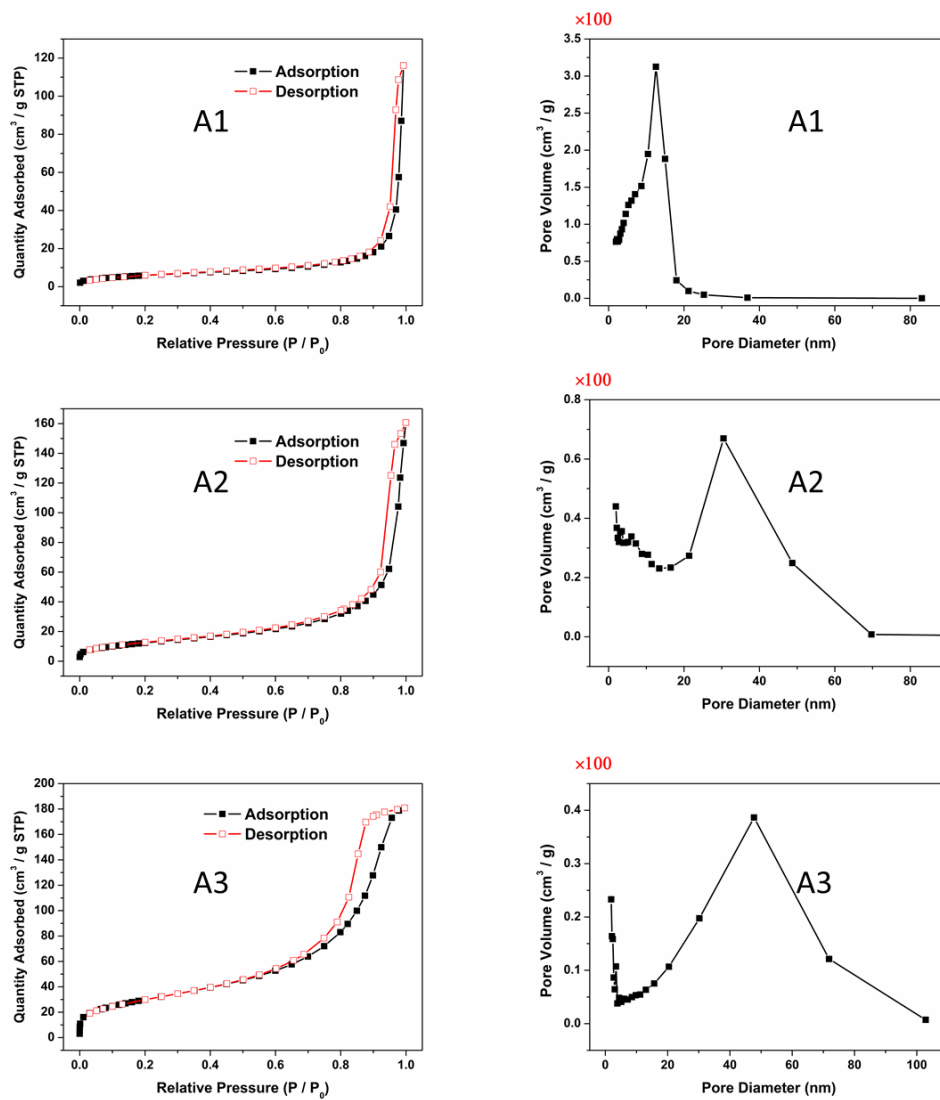

Fig. S6. Nitrogen adsorption–desorption isotherms (left) and Barrett-Joyner-Halenda (BJH) pore size distribution profiles (right) of A1, A2 and A3.



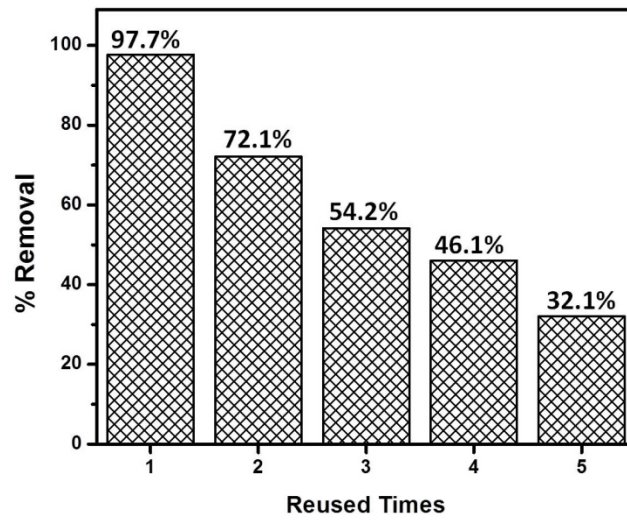

Fig. S7. Recycle test of CR removal efficiency of  $\alpha\text{-Fe}_2\text{O}_3$  A3.
